# Supplementary material for: Genetic predictors of participation in optional components of UK Biobank
Source: PubMed Central journal article supplement (PMC7873270; doi:10.1038/s41467-021-21073-y), 2021-02-09
Supplement: 41467_2021_21073_MOESM1_ESM.pdf [file 41467_2021_21073_MOESM1_ESM.pdf]

**Genetic predictors of participation in optional components of UK Biobank**

Tyrrell et al.

**Supplementary figure 1:** Manhattan plots of the UK Biobank participation measures from the BOLT-LMM GWAS. A) Food frequency questionnaire, B) Physical Activity, C) Mental health questionnaire and D) aide memoire  
A)

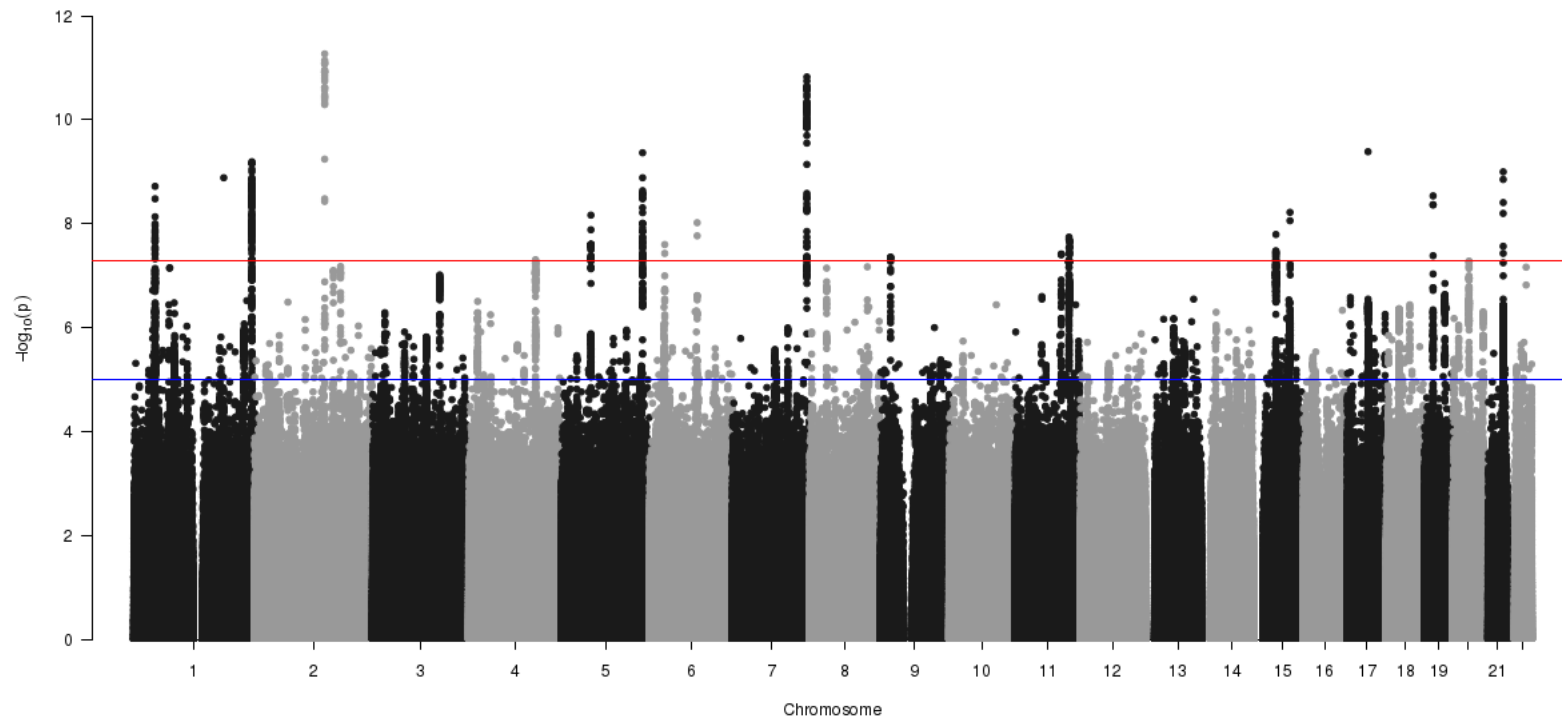

B)

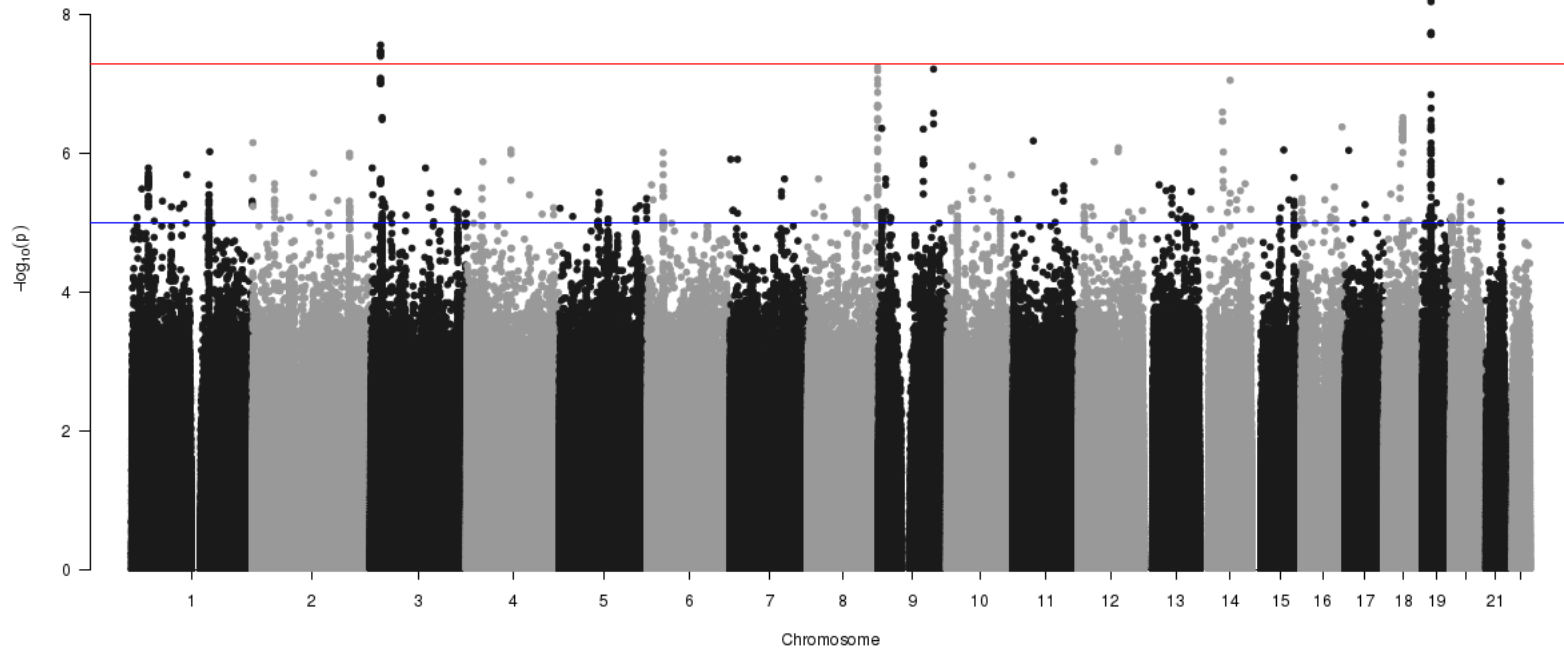

c)

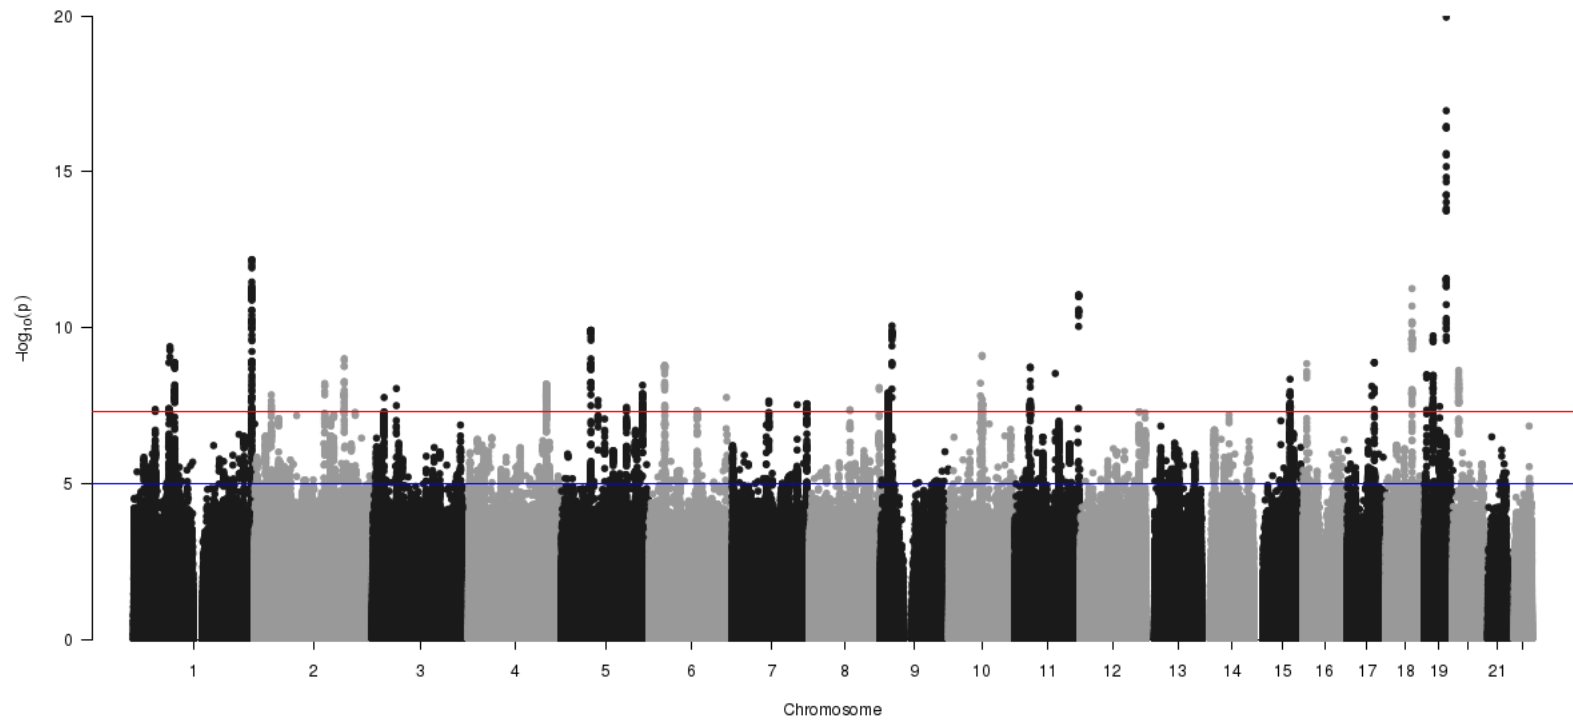

D)

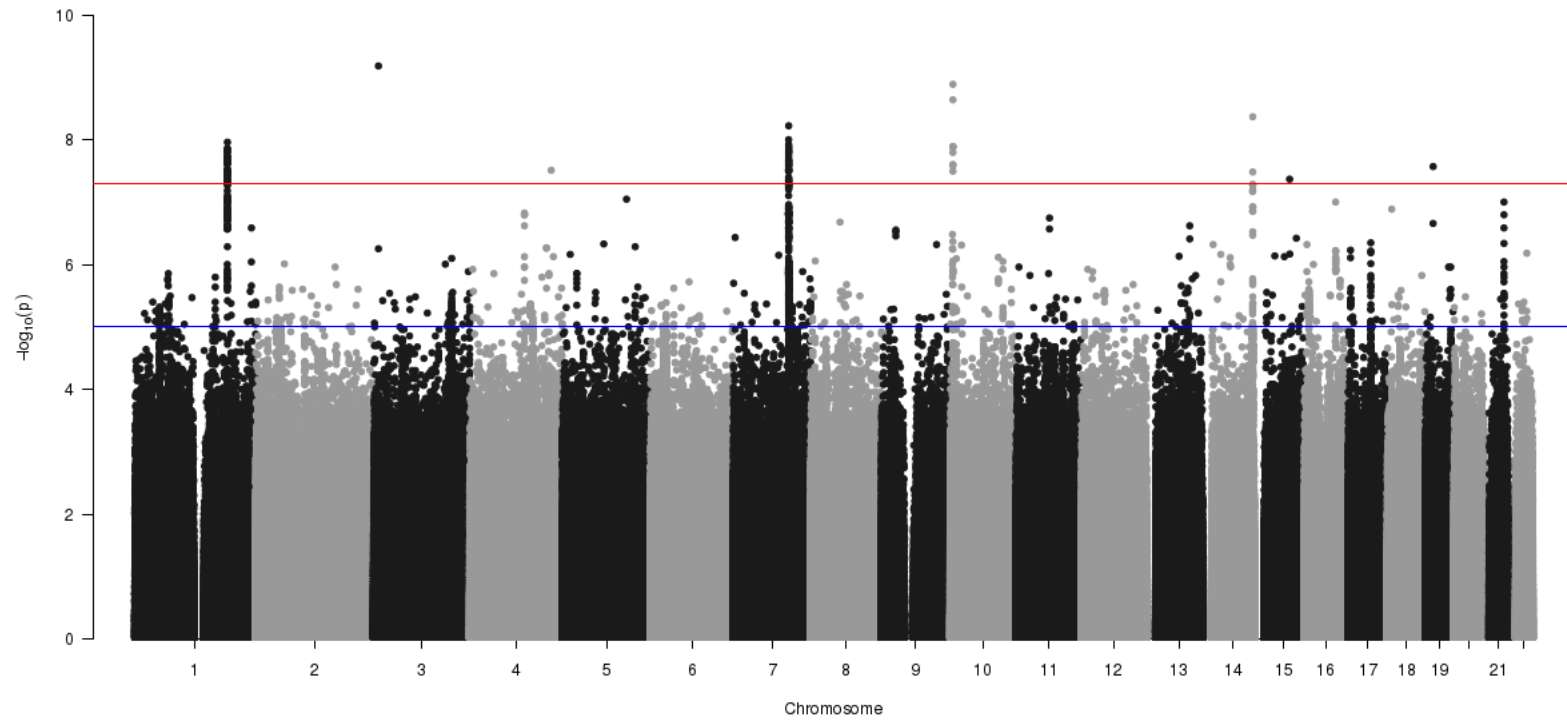

Supplementary table 1: Odds ratio (95%CI) for participation in the different components of the UK Biobank if participated in another component

| Participation Outcome | Participation predictor |                   |                   |              |
|-----------------------|-------------------------|-------------------|-------------------|--------------|
|                       | FFQ                     | Physical activity | MHQ               | Aide memoire |
| FFQ                   | NA                      | -                 | -                 | -            |
| Physical activity     | 3.73 (3.65, 3.80)       | NA                | -                 | -            |
| MHQ                   | 4.45 (4.37, 4.52)       | 6.66 (6.53, 6.80) | NA                | -            |
| Aide memoire          | 1.21 (1.19, 1.24)       | 1.17 (1.14, 1.19) | 1.20 (1.18, 1.22) | NA           |

\*Results from age and sex adjusted logistic regression. All  $P < 1 \times 10^{-15}$

Supplementary table 2: Genetic correlations between the different participation measures and whether participants were invited to one of the three optional components in the UK Biobank

| Trait1               | Trait2                                                      | rg             | se             | z           | p             | h2_obs | h2_obs_s<br>e | h2_in<br>t | h2_int_s<br>e | gcov_<br>int | gcov_i<br>nt_se |
|----------------------|-------------------------------------------------------------|----------------|----------------|-------------|---------------|--------|---------------|------------|---------------|--------------|-----------------|
| Aide<br>memoire      | MHQ                                                         | 0.159<br>3     | 0.038<br>8     | 4.1049      | 4.05E-05      | 0.0549 | 0.0021        | 1.033<br>7 | 0.0095        | 0.047        | 0.005           |
| Aide<br>memoire      | FFQ                                                         | 0.354<br>3     | 0.041<br>7     | 8.5021      | 1.86E-17      | 0.0422 | 0.0018        | 1.033<br>8 | 0.0096        | 0.044<br>8   | 0.0051          |
| Aide<br>memoire      | Physical activity                                           | 0.160<br>3     | 0.065<br>2     | 2.4562      | 0.014         | 0.0152 | 0.0012        | 1.013<br>7 | 0.0064        | 0.030<br>8   | 0.0048          |
| Aide<br>memoire      | Invited to participate in MHQ, FFQ and<br>Physical activity | 0.048<br>2     | 0.044<br>5     | 1.083       | 0.2788        | 0.0116 | 0.0013        | 1.011<br>2 | 0.0065        | 0.035<br>5   | 0.0055          |
| MHQ                  | FFQ                                                         | 0.917<br>2     | 0.013<br>5     | 67.711<br>6 | 0             | 0.0422 | 0.0018        | 1.033<br>8 | 0.0096        | 0.404<br>8   | 0.008           |
| MHQ                  | Physical activity                                           | 0.846<br>9     | 0.030<br>9     | 27.429<br>8 | 1.21E-<br>165 | 0.0152 | 0.0012        | 1.013<br>7 | 0.0064        | 0.326<br>7   | 0.0063          |
| MHQ                  | Invited to participate in MHQ, FFQ and<br>Physical activity | 0.855<br>7     | 0.013<br>2     | 64.837<br>4 | <1E-250       | 0.0546 | 0.0022        | 1.036<br>3 | 0.0098        | 0.425<br>8   | 0.0076          |
| FFQ                  | Physical activity                                           | 0.871<br>3     | 0.031<br>3     | 27.819<br>5 | 2.52E-<br>170 | 0.0152 | 0.0012        | 1.013<br>7 | 0.0064        | 0.288<br>8   | 0.0056          |
| FFQ                  | Invited to participate in MHQ, FFQ and<br>Physical activity | 0.651<br>0.610 | 0.021<br>0.037 | 30.048<br>8 | 2.26E-<br>198 | 0.0416 | 0.0019        | 1.038<br>7 | 0.0101        | 0.013<br>7   | 0.0059          |
| Physical<br>activity | Invited to participate in MHQ, FFQ and<br>Physical activity | 0.610<br>2     | 0.037<br>5     | 16.264      | 1.78E-59      | 0.0152 | 0.0012        | 1.013<br>9 | 0.0065        | 0.005<br>7   | 0.0057          |

rg - genetic correlation; se - standard error of genetic correlation; z - z-score of the genetic correlation; p - p-value of genetic correlation (two-sided and no adjustment for multiple comparisons, but only those reaching Bonferroni significance are reported);  
h2\_obs - observed SNP heritability of trait 2; h2\_obs\_se - standard error of SNP heritability; h2\_int - the intercept term of the univariate LDSC of trait 2; h2\_int\_se - standard error of intercept term  
gcov\_int - the phenotypic correlation between trait 1 and trait 2 after accounting for sample overlap; gcov\_int\_se - standard error of gcov\_int

Supplementary table 3: Demographics of those invited to participate in at least one optional survey versus those not invited to participate

| Demographic                                | Invited to at least one optional survey | Not invited to any optional surveys | Odds (95%CI) of receiving an invitation to participate in optional surveys per unit change in demographic* | p**                  |
|--------------------------------------------|-----------------------------------------|-------------------------------------|------------------------------------------------------------------------------------------------------------|----------------------|
| N                                          | 336,633                                 | 114,464                             |                                                                                                            |                      |
| Mean age at baseline (SD)                  | 56.7 (8.0)                              | 59.1 (7.9)                          | 0.96 (0.96, 0.96)                                                                                          | <1x10 <sup>-15</sup> |
| Male sex, N (%)                            | 155,174 (46.1)                          | 51,077 (44.6)                       | 1.07 (1.06, 1.09)                                                                                          | <1x10 <sup>-15</sup> |
| Mean BMI at baseline (SD)                  | 27.2 (4.7)                              | 28.0 (5.0)                          | 0.84 (0.83, 0.85)                                                                                          | <1x10 <sup>-15</sup> |
| Mean Townsend deprivation index (SD)       | -1.71 (2.8)                             | -0.77 (3.3)                         | 0.50 (0.48, 0.51)                                                                                          | <1x10 <sup>-15</sup> |
| Mean years in education (SD)***            | 15.6 (4.8)                              | 12.5 (5.3)                          | 1.10 (1.09, 1.10)                                                                                          | <1x10 <sup>-15</sup> |
| Mean systolic blood pressure (SD)          | 143 (24)                                | 149 (25)                            | 0.85 (0.84, 0.86)                                                                                          | <1x10 <sup>-15</sup> |
| Mean fluid intelligence (SD)               | 6.0 (2.1)                               | 4.8 (1.9)                           | 1.48 (1.47, 1.49)                                                                                          | <1x10 <sup>-15</sup> |
| Mean self reported physical activity       | 7.4 (1.1)                               | 7.4 (1.2)                           | 0.91 (0.90, 0.92)                                                                                          | <1x10 <sup>-15</sup> |
| Mean physical activity (accelerometer)**** | 0.21 (0.07)                             | NA                                  | NA                                                                                                         | NA                   |
| Smoking status, N (%)                      |                                         |                                     |                                                                                                            |                      |
| Never                                      | 185,195 (55.0)                          | 57,512 (50.2)                       | Reference                                                                                                  | Reference            |
| Former                                     | 121,357 (36.1)                          | 38,561 (33.7)                       | 1.06 (1.04, 1.07)                                                                                          | 1x10 <sup>-13</sup>  |
| Current                                    | 26,015 (7.7)                            | 16,367 (14.3)                       | 0.45 (0.44, 0.46)                                                                                          | <1x10 <sup>-15</sup> |
| Type 2 diabetes, N (%)                     | 14,378 (4.3)                            | 8,185 (7.2)                         | 0.68 (0.66, 0.70)                                                                                          | <1x10 <sup>-15</sup> |
| Depression, N (%)                          | 40,234 (12.0)                           | 8,850 (7.7)                         | 1.32 (1.30, 1.33)                                                                                          | <1x10 <sup>-15</sup> |

\*For all continuous measures this is per SD change except for age and educational years which are per year

\*\*P-value from logistic regression, adjusted for age, sex and assessment centre



Supplementary table 8: List of predictor traits from 8 different categories used in Mendelian randomization.

| Test trait                             | Category       | N SNPs<br>in 2-<br>sample<br>MR | Primary GWAS reference                                     | Notes                        |
|----------------------------------------|----------------|---------------------------------|------------------------------------------------------------|------------------------------|
| BMI                                    | Anthropometric | 72                              | Locke et al., 2015                                         |                              |
| Body fat percentage                    | Anthropometric | 10                              | Lu et al., 2016                                            |                              |
| Bone mineral density<br>(femur neck)   | Anthropometric | 50                              | Estrada et al., 2012                                       |                              |
| Bone mineral density<br>(lumbar spine) | Anthropometric | 48                              | Estrada et al., 2012                                       |                              |
| Favourable adiposity                   | Anthropometric | 14                              | Ji et al., 2019                                            |                              |
| Forced vital capacity                  | Anthropometric | 6                               | Loth et al., 2014                                          |                              |
| Height                                 | Anthropometric | 809                             | Wood et al., 2014                                          |                              |
| Maternal birthweight                   | Anthropometric | 9                               | Beaumont et al., 2018                                      |                              |
| Waist hip ratio                        | Anthropometric | 315                             | Pulit et al., 2018                                         |                              |
| Waist hip ratio (adjusted<br>for BMI)  | Anthropometric | 345                             | Pulit et al., 2018                                         |                              |
| Age lost virginity                     | Behavioural    | 29                              | Day et al., 2016                                           |                              |
| Alcohol consumption                    | Behavioural    | 8                               | Clarke et al., 2017<br>Coffee and Caffeine Genetics        | UK Biobank used in discovery |
| Caffeine                               | Behavioural    | 6                               | Consortium, 2015                                           |                              |
| Chronotype                             | Behavioural    | 46                              | Jones et al., 2019                                         |                              |
| Extraversion                           | Behavioural    | 4                               | Lo et al., 2017                                            |                              |
| Risk taking                            | Behavioural    | 13                              | UK Biobank analyses in 120,000<br>The Tobacco and Genetics |                              |
| Smoking                                | Behavioural    | 4                               | Consortium, 2010                                           |                              |

|                                           |                                               |    |                         |
|-------------------------------------------|-----------------------------------------------|----|-------------------------|
| Alkaline phosphatase (ALP)                | Biomarkers, metabolites and cellular features | 14 | Chambers et al., 2011   |
| C-reactive protein (CRP)                  | Biomarkers, metabolites and cellular features | 14 | Dehghan et al., 2011    |
| Calcium                                   | Biomarkers, metabolites and cellular features | 7  | O'Seaghdha et al., 2013 |
| Estimated glomerula filtration rate (GFR) | Biomarkers, metabolites and cellular features | 50 | Pattaro et al., 2015    |
| Ferritin                                  | Biomarkers, metabolites and cellular features | 6  | Benyamin et al., 2014   |
| Gamma glutamyl transferase (GGT)          | Biomarkers, metabolites and cellular features | 25 | Chambers et al., 2011   |
| Haemoglobin                               | Biomarkers, metabolites and cellular features | 11 | Danjou et al., 2015     |
| Iron levels                               | Biomarkers, metabolites and cellular features | 5  | Benyamin et al., 2014   |
| Mean cell haemoglobin                     | Biomarkers, metabolites and cellular features | 27 | Astle et al., 2016      |
| Mean cell volume                          | Biomarkers, metabolites and cellular features | 23 | Astle et al., 2016      |
| Red blood cell count                      | Biomarkers, metabolites and cellular features | 10 | Astle et al., 2016      |
| Telomere length                           | Biomarkers, metabolites and cellular features | 7  | Codd et al., 2013       |
| Thyroid stimulating hormone (TSH)         | Biomarkers, metabolites and cellular features | 20 | Porcu et al., 2013      |
| Transferrin                               | Biomarkers, metabolites and cellular features | 9  | Benyamin et al., 2014   |
| Transferrin saturation                    | Biomarkers, metabolites and cellular features | 5  | Benyamin et al., 2014   |

|                                  |                                               |     |                                                                                                                                                |            |
|----------------------------------|-----------------------------------------------|-----|------------------------------------------------------------------------------------------------------------------------------------------------|------------|
| Urate                            | Biomarkers, metabolites and cellular features | 19  | Kottgen et al., 2012                                                                                                                           |            |
| Vitamin D                        | Biomarkers, metabolites and cellular features | 6   | Jiang, et al, 2018                                                                                                                             |            |
| Breast cancer                    | Cancer                                        | 75  | Michailidou et al., 2015                                                                                                                       | Women only |
| Colorectal cancer                | Cancer                                        | 36  | Schumacher et al., 2015                                                                                                                        |            |
| Prostate cancer                  | Cancer                                        | 57  | Almi Al Olama et al., 2015                                                                                                                     | Men only   |
| 2 hour glucose                   | Cardiovascular and metabolic markers          | 8   | Scott et al., 2012                                                                                                                             |            |
| Coronary artery disease (CAD)    | Cardiovascular and metabolic markers          | 64  | Nikpay et al., 2015<br>Ehret et al., 2016; International Consortium for Blood Pressure GWAS, 2011; Warren et al., 2017; Surendran et al., 2016 |            |
| Diastolic blood pressure (DBP)   | Cardiovascular and metabolic markers          | 109 |                                                                                                                                                |            |
| Fasting glucose                  | Cardiovascular and metabolic markers          | 33  | Scott et al., 2012                                                                                                                             |            |
| Fasting insulin                  | Cardiovascular and metabolic markers          | 14  | Scott et al., 2012                                                                                                                             |            |
| Fasting insulin adjusted for BMI | Cardiovascular and metabolic markers          | 12  | Scott et al., 2012<br>Global Lipids Genetics Consortium<br>( <a href="http://lipidgenetics.org">http://lipidgenetics.org</a> )                 |            |
| HDL cholesterol                  | Cardiovascular and metabolic markers          | 98  |                                                                                                                                                |            |
| Homocysteine                     | Cardiovascular and metabolic markers          | 13  | van Meurs et al., 2013                                                                                                                         |            |
| IgA nephropathy                  | Cardiovascular and metabolic markers          | 15  | Kiryluk et al., 2014                                                                                                                           |            |
| Insulin resistance               | Cardiovascular and metabolic markers          | 53  | Lotta et al., 2017                                                                                                                             |            |

|                                  |                                      |     |                                                                                                                                                     |                                             |
|----------------------------------|--------------------------------------|-----|-----------------------------------------------------------------------------------------------------------------------------------------------------|---------------------------------------------|
| Insulin secretion                | Cardiovascular and metabolic markers | 11  | Dimas et al., 2014<br>Global Lipids Genetics Consortium<br>( <a href="http://lipidgenetics.org">http://lipidgenetics.org</a> )                      |                                             |
| LDL cholesterol                  | Cardiovascular and metabolic markers | 80  |                                                                                                                                                     |                                             |
| Leptin adjusted for BMI          | Cardiovascular and metabolic markers | 9   | Kilpelainen et al., 2016<br>Ehret et al., 2016; International Consortium for Blood Pressure GWAS, 2011; Warren et al., 2017; Surendran et al., 2016 |                                             |
| Pulse pressure                   | Cardiovascular and metabolic markers | 44  |                                                                                                                                                     |                                             |
| Resting heart rate               | Cardiovascular and metabolic markers | 71  | Eppinga et al., 2016                                                                                                                                |                                             |
| Stroke                           | Cardiovascular and metabolic markers | 6   | Malik et al., 2018<br>Ehret et al., 2016; International Consortium for Blood Pressure GWAS, 2011; Warren et al., 2017; Surendran et al., 2016       |                                             |
| Systolic blood pressure (SBP)    | Cardiovascular and metabolic markers | 89  | Global Lipids Genetics Consortium<br>( <a href="http://lipidgenetics.org">http://lipidgenetics.org</a> )                                            |                                             |
| Triglycerides                    | Cardiovascular and metabolic markers | 62  |                                                                                                                                                     |                                             |
| Type 2 diabetes                  | Cardiovascular and metabolic markers | 89  | Mahajan et al., 2018                                                                                                                                |                                             |
| Educational attainment           | Education and cognition              | 69  | Okbay et al., 2016                                                                                                                                  | SNPs were those at GWS excluding UK Biobank |
| intelligence                     | Education and cognition              | 14  | Sniekers et al., 2017                                                                                                                               |                                             |
| Age related macular degeneration | Other diseases                       | 28  | Fritsche et al., 2016                                                                                                                               |                                             |
| Crohn's disease                  | Other diseases                       | 142 | Liu et al., 2015                                                                                                                                    |                                             |

|                                     |                                           |           |                                                                                                                 |                                            |
|-------------------------------------|-------------------------------------------|-----------|-----------------------------------------------------------------------------------------------------------------|--------------------------------------------|
| Irritable bowel disease             | Other diseases                            | 158       | Liu et al., 2015                                                                                                |                                            |
| Migraine                            | Other diseases                            | 33        | Gormley et al., 2016                                                                                            |                                            |
| Motion sick                         | Other diseases                            | 35        | Hromatka et al., 2015                                                                                           |                                            |
| Osteoarthritis                      | Other diseases                            | 5         | Evangelou et al., 2012                                                                                          |                                            |
| Restless legs                       | Other diseases                            | 19        | Schormair et al., 2017                                                                                          |                                            |
| Ulcerative colitis                  | Other diseases                            | 87        | Liu et al., 2015                                                                                                |                                            |
| Alzheimer's disease                 | Psychological and neurological conditions | 21        | Lambert et al., 2013                                                                                            |                                            |
| Bipolar disorder                    | Psychological and neurological conditions | 21        | <a href="https://www.biorxiv.org/content/10.1101/173062v4">https://www.biorxiv.org/content/10.1101/173062v4</a> | Data from BioRxiv and PGC consortium       |
| Depression                          | Psychological and neurological conditions | 17 and 38 | Hyde et al., 2016 and Wray et al., 2018                                                                         | Wray et al., discovery included UK Biobank |
| Neuroticism                         | Psychological and neurological conditions | 9         | Genetics of Personality Consortium et al., 2015                                                                 |                                            |
| Schizophrenia                       | Psychological and neurological conditions | 137       | Pardinas et al., 2018                                                                                           |                                            |
| DHEAS                               | Reproductive traits                       | 8         | Zhai et al., 2011                                                                                               |                                            |
| Endometriosis                       | Reproductive traits                       | 14        | Sapkota et al., 2017                                                                                            | Women only                                 |
| Gestational duration                | Reproductive traits                       | 5         | Zhang et al., 2017                                                                                              |                                            |
| Menarche                            | Reproductive traits                       | 128       | Perry et al., 2014                                                                                              | Women only                                 |
| Menopause                           | Reproductive traits                       | 56        | Day et al., 2015                                                                                                | Women only                                 |
| Polycystic ovaries (PCOS)           | Reproductive traits                       | 6         | Day et al., 2015                                                                                                | Women only                                 |
| Sex hormone binding globulin (SHBG) | Reproductive traits                       | 12        | Coviello et al., 2012                                                                                           |                                            |
