# Supplementary material for: Genetic predictors of participation in optional components of UK Biobank
Source: PubMed Central journal article supplement (PMC7873270; doi:10.1038/s41467-021-21073-y), 2021-02-09
Supplement: 41467_2021_21073_MOESM3_ESM.pdf [file 41467_2021_21073_MOESM3_ESM.pdf]

## **Descriptions of Additional Supplementary Files**

### **Supplementary Data 1**

**Description:** Variants identified at genome wide significance for not receiving an invite to participate in at least one of optional components of the UK Biobank

### **Supplementary Data 2:**

**Description:** Variants associated with the four participation measures from genome wide association analyses in the UK Biobank with  $6 \times 10^{-9} < P < 5 \times 10^{-8}$

### **Supplementary Data 3**

**Description:** Mendelian randomization results for a range of different test traits against the four participation measures.

### **Supplementary Data 4**

**Description:** Results from 1-sample MR analyses, representing odds of participation per SD higher genetically instrumented cigarettes per day
